# Supplementary material for: Osteoclast stimulation factor 1 (Ostf1) KNOCKOUT increases trabecular bone mass in mice
Source: Springer Nature journal article supplement (doi:10.1007/s00335-017-9718-3), 2017-09-21

# Normalised Data

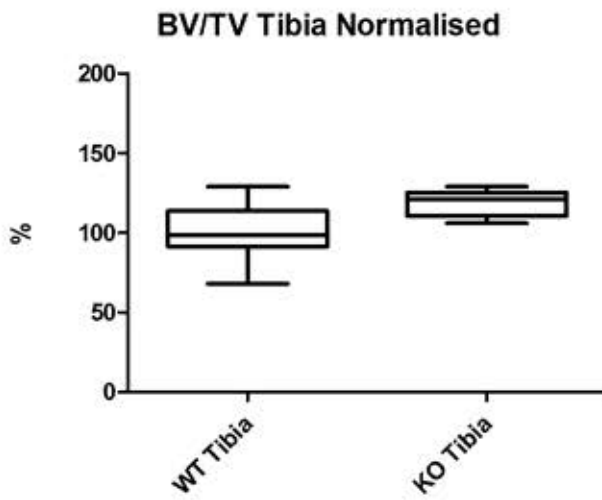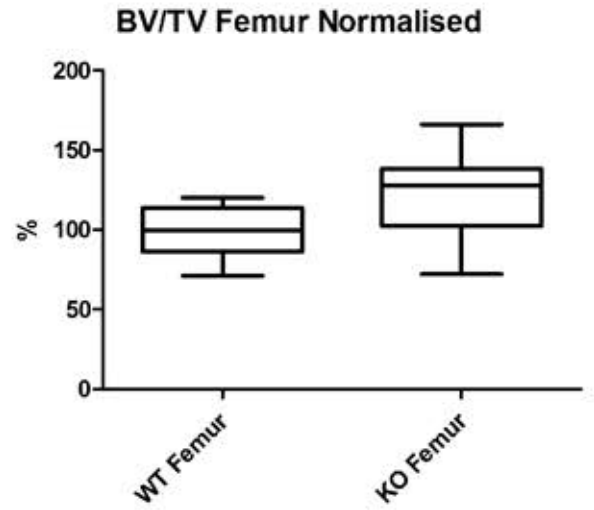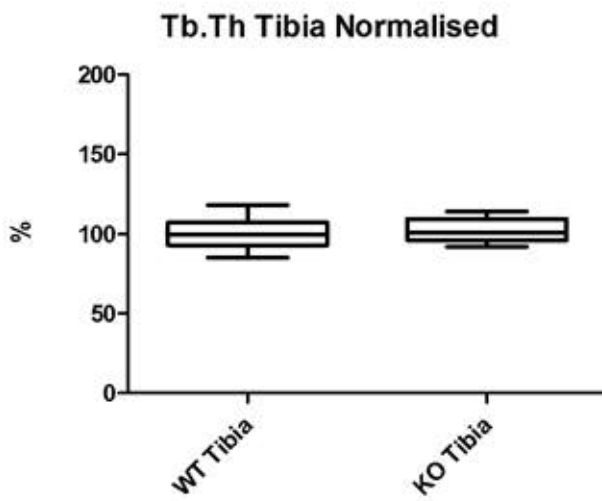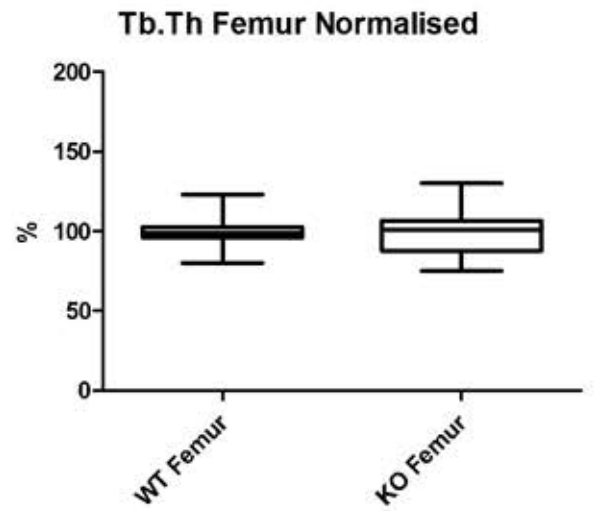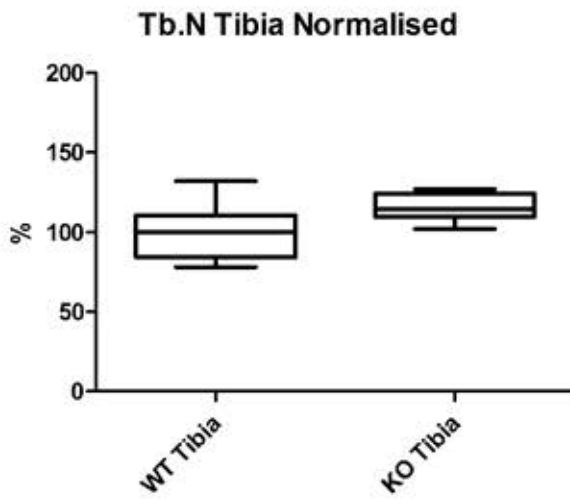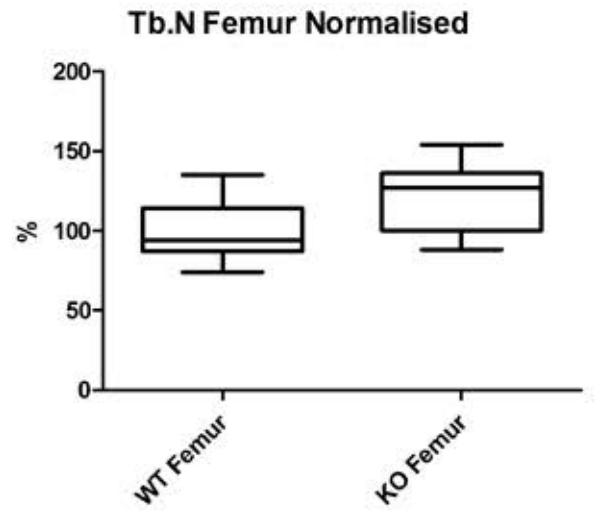

Supplement: MOESM2 [file 335_2017_9718_MOESM2_ESM.pdf]
